# Supplementary material for: DNA methylation profiling of genomic DNA isolated from urine in diabetic chronic kidney disease: A pilot study
Source: PubMed Central journal article supplement (PMC5819761; doi:10.1371/journal.pone.0190280), 2018-02-20

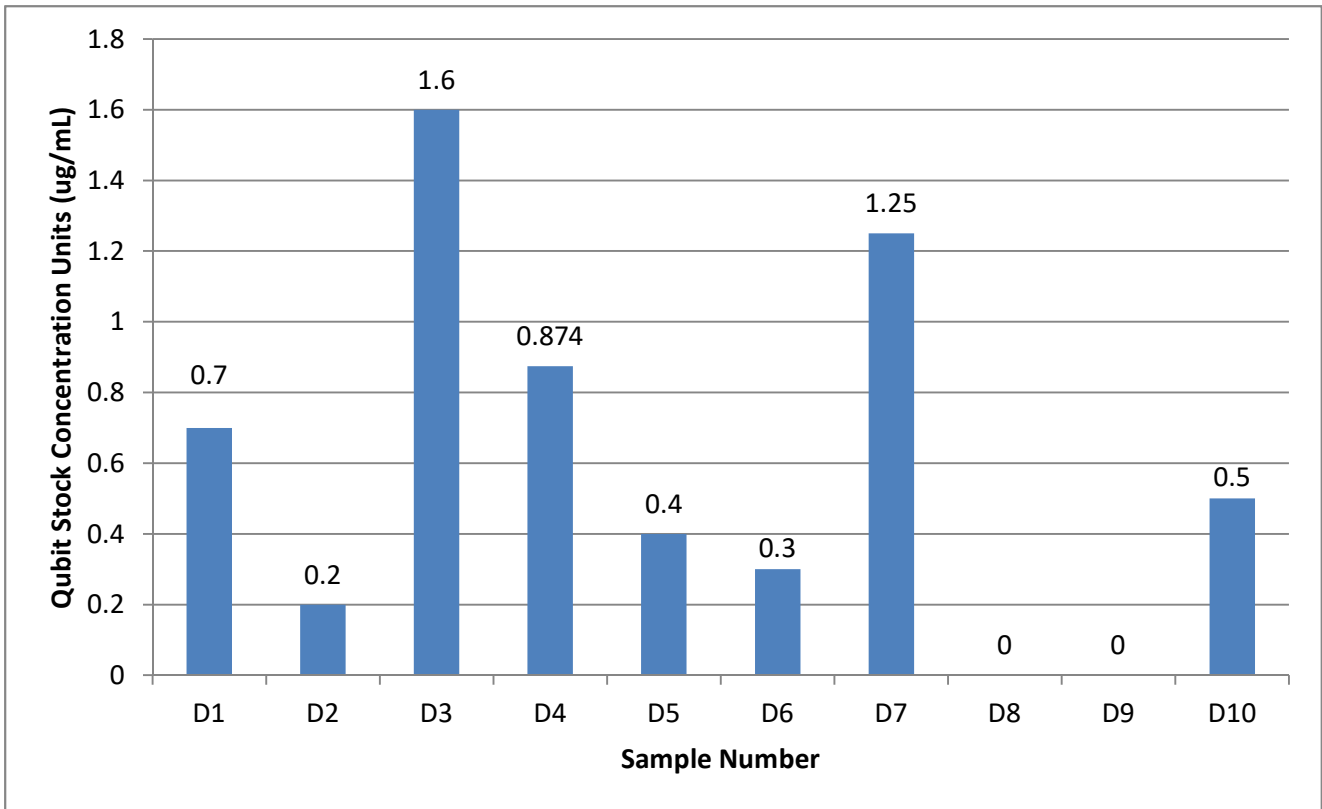

Supplement: pone.0190280.s004.pdf [file pone.0190280.s004.pdf]
