# Supplementary material for: DNA methylation profiling of genomic DNA isolated from urine in diabetic chronic kidney disease: A pilot study
Source: PubMed Central journal article supplement (PMC5819761; doi:10.1371/journal.pone.0190280), 2018-02-20
Supplement: pone.0190280.s006.pdf [file pone.0190280.s006.pdf]

| Sample ID | sample type | isolation method | gDNA concentration (ug/mL) | final volume (uL) | total gDNA (ng) | HM850K probe detection |        |
|-----------|-------------|------------------|----------------------------|-------------------|-----------------|------------------------|--------|
|           |             |                  |                            |                   |                 | p<0.01                 | p<0.05 |
| 102       | Urine       | 1                | 64.2                       | 20                | 1284            | 484570                 | 634810 |
|           | Buffy Coat  |                  | 55                         | 20                | 1100            | 865987                 | 866370 |
| 7         | Urine       | 1                | 51.6                       | 20                | 1032            | 865140                 | 865917 |
|           | Buffy Coat  |                  | 39                         | 20                | 780             | 865868                 | 866380 |
| 73        | Urine       | 1                | 67.8                       | 20                | 1356            | 842334                 | 855993 |
|           | Buffy Coat  |                  | 67                         | 20                | 1340            | 865411                 | 866181 |
| 993       | Urine       | 1                | 116                        | 20                | 2320            | 532815                 | 664975 |
| 50        | Buffy Coat  |                  | 123                        | 20                | 2460            | 865560                 | 866326 |
